1 **Serum proteomic profiling at diagnosis predicts clinical course, and**  
2 **need for intensification of treatment in inflammatory bowel disease.**

3 Kalla R<sup>1,2\*</sup>, Adams AT<sup>1,3\*</sup>, Bergemalm D<sup>4</sup>, Vatn S<sup>5</sup>, Kennedy NA<sup>1,6</sup>, Ricanek P<sup>5,15</sup>, Lindstrom  
4 J<sup>7,15</sup>, Ocklind A<sup>8</sup>, Hjelm F<sup>8</sup>, Ventham NT<sup>1</sup>, Ho GT<sup>2</sup>, Petren C<sup>8</sup>, IBD-Character Consortium,  
5 Repsilber D<sup>9</sup>, Söderholm J<sup>10</sup>, Pierik M<sup>11</sup>, D'Amato M<sup>12,13</sup>, Gomollón F<sup>14</sup>, Olbjorn C<sup>5,15</sup>,  
6 Jahnsen J<sup>5,15</sup>, Vatn MH<sup>15</sup>, Halfvarson J<sup>4</sup>, Satsangi J<sup>1,3</sup>.

7 <sup>1</sup> Institute of Genetics and Molecular Medicine, University of Edinburgh, United Kingdom

8 <sup>2</sup> MRC Centre for Inflammation Research, Queens Medical Research Institute, University of  
9 Edinburgh, United Kingdom

10 <sup>3</sup> Translational Gastroenterology Unit, Nuffield Department of Medicine, Experimental  
11 Medicine Division, University of Oxford, John Radcliffe Hospital, Oxford, United Kingdom

12 <sup>4</sup> Department of Gastroenterology, Faculty of Medicine and Health, Örebro University, SE  
13 70182 Örebro, Sweden

14 <sup>5</sup> Department of Gastroenterology, Akershus University Hospital, Lørenskog, Norway

15 <sup>6</sup> Exeter IBD and Pharmacogenetics group, University of Exeter, United Kingdom

16 <sup>7</sup> Health Services Research Unit, Akershus University Hospital, Lørenskog, Norway

17 <sup>8</sup> Olink Proteomics, Uppsala, Sweden

18 <sup>9</sup> School of Medical Sciences, Örebro University, Örebro, Sweden

19 <sup>10</sup> Department of Surgery and Clinical and Experimental Medicine, Linköping University,  
20 Linköping, Sweden

21 <sup>11</sup> Maastricht University Medical Centre (MUMC), Department of Gastroenterology and  
22 Hepatology, Maastricht, Netherlands

23 <sup>12</sup> Biocruces Health Research Institute, Molecular Genetics of Digestive Diseases, Cruces,  
24 Bilbao, Spain.

25 <sup>13</sup> School of Biological Sciences, Monash University, Victoria, Australia

26 <sup>14</sup> HCU “Lozano Blesa,” IIS Aragón, Zaragoza, Spain

27 <sup>15</sup> Institute of Clinical Medicine, Campus Ahus, University of Oslo, Oslo, Norway.

28 **Corresponding authors:** Professor J Satsangi, Dr Rahul Kalla, Dr Alex Adams.

29 **Keywords:** Crohn's disease, proteins, genetics, inflammatory bowel diseases (IBD),  
30 ulcerative colitis, OSM, prognosis, outcomes, protein quantitative trait loci, proximity  
31 extension assay,

32 **Word Counts:** Abstract 248; Manuscript 3796

33

## 34 Summary

35 **Background:** Success in personalised medicine in complex disease is critically dependent on  
36 biomarker discovery. We profiled serum proteins using a novel proximity extension assay  
37 (PEA) to identify diagnostic and prognostic biomarkers in inflammatory bowel disease  
38 (IBD).

39 **Methods:** We conducted a prospective case-control study in an inception cohort of 552  
40 patients (328 IBD, 224 non-IBD), profiling proteins recruited across 6 centres. Treatment  
41 escalation was characterised by the need for biological agents or surgery after initial disease  
42 remission. Nested leave-one-out cross validation was used to examine the performance of  
43 diagnostic and prognostic proteins.

44 **Results:** A total of 66 serum proteins differentiated IBD from symptomatic non-IBD controls  
45 including Matrix Metalloproteinase-12 (Holm adjusted  $p=4.1 \times 10^{-23}$ ) and Oncostatin-M  
46 (OSM,  $p=3.7 \times 10^{-16}$ ). Nine of these proteins associate with *cis*- germline variation (59  
47 independent SNPs). Fifteen proteins, all members of TNF independent pathways including  
48 interleukin-1 and OSM predicted escalation, over a median follow-up of 518 (IQR 224-756)  
49 days. Nested cross-validation of the entire data set allows characterisation of 5-protein-  
50 models (96% comprising five core proteins ITGAV, EpCAM, IL18, SLAMF7, and IL8)  
51 which define a high-risk subgroup in IBD (HR 3.90, 95% CI: 2.43-6.26), or allows distinct 2,  
52 and 3 protein models for UC and CD respectively.

53 **Conclusion:** We have characterised a simple oligo-protein panel that has the potential to  
54 identify IBD from symptomatic controls and predicts the evolution of disease over time. The  
55 technology could be suitable as a point of care testing in defining risk. Further prospective  
56 work is required to characterise the utility of the approach.

## 57 **Introduction**

58 Personalised medicine is now a major priority in healthcare research. Programmes such as the  
59 7<sup>th</sup> framework programme for research and technological development and 100,000 genomes  
60 project ([www.genomicsengland.co.uk](http://www.genomicsengland.co.uk)) in the UK prioritise the discovery and validation of  
61 novel biomarkers in human diseases<sup>1</sup>. This impetus to redefine clinical practice coupled with  
62 an increasingly wide therapeutic choice of biological agents, and small molecules has driven  
63 interest in risk-stratifying patients at diagnosis in Inflammatory Bowel Disease (IBD)<sup>2-4</sup>.

64 There have been recent scientific advances catalysing biomarker discovery studies. It is now  
65 apparent that genes that contribute to prognosis in Crohn's disease (CD) are distinct from  
66 those that predict disease susceptibility<sup>4</sup>. Studies in both adults and children have  
67 demonstrated that patients with a progressive disease display a unique transcriptional  
68 signature<sup>3,5-7</sup>. Critically for translation, emergent data demonstrate that early biomarker-  
69 driven therapeutic interventions can improve disease outcomes in CD<sup>8</sup>.

70 Despite significant progress in multi-omic biomarker discoveries, none are in routine clinical  
71 use. Markers such as c-reactive protein (CRP) have shown clinical utility in disease  
72 susceptibility, activity and behaviour<sup>1</sup>. Faecal calprotectin (FC) however has emerged to date  
73 as the most reliable and accurate diagnostic protein biomarker in IBD<sup>9</sup>. Recently, randomised  
74 trial data demonstrate that early biomarker-driven therapeutic interventions based on FC can  
75 improve disease outcomes in CD<sup>8</sup>. However, there are well-described limitations of faecal  
76 testing in clinical care<sup>2,10,11</sup> that highlight the need for blood-based markers to maximise  
77 uptake and acceptability.

78 Multiprotein signatures have potentially diverse clinical applications from early detection of  
79 IBD to disease classification and behaviour, response to therapy, and monitoring disease  
80 activity. Technological limitations in multi-protein profiling have recently been

81 overcome<sup>12,13</sup>, with the discovery of innovative approaches for multiplexing biological  
82 samples utilizing minimal sample volume but providing a highly sensitive and specific  
83 immunoassay. Proximity extension assays (PEA) are antibody-based methods that utilise two  
84 or more DNA-tagged aptamers or antibodies that bind when in close proximity to the target  
85 protein or protein complex. PEA allows multiplexing with 1 microlitre ( $\mu\text{L}$ ) sample  
86 consumption, and a high sensitivity and specificity for proteins of interest <sup>12,13</sup>

87 In this report, we explore the diagnostic and prognostic capabilities of circulating PEA based  
88 proteins markers in IBD and their association with germline variations. Our study  
89 demonstrates that protein panels can predict disease and its course.

## 90 **Materials and Methods**

### 91 **Study Design**

92 We conducted a prospective, multi-centre case-control study in patients with suspected or  
93 confirmed IBD, recruited at presentation either as in-patients or electively as out-patients  
94 across 6 clinical centres in UK and Europe (EU Character reference no. 305676) .  
95 Demographic data including age, sex, date of diagnosis (**Table 1**) and details of drug  
96 therapies were collected. Treatment naivety within the IBD cohort was defined as no  
97 exposure to any IBD related medical therapies such as steroids, 5-ASA, biologics and  
98 immunomodulators (**Supplementary Table 1**). Blood samples for protein profiles and  
99 genotyping were collected at baseline at the time of recruitment. High sensitivity C-reactive  
100 protein (hsCRP), albumin, and faecal calprotectin (if stool had been collected around  
101 recruitment), were re-assayed in a single batch at the end of recruitment. Other routine  
102 markers were tested as part of routine clinical care. Clinical outcome data were collected at  
103 follow up for patients with IBD.

104 **Inclusion criteria**

105 Patients with a suspected or new diagnosis of IBD were included in the study; prospectively  
106 recruited from out-patients and in-patient settings across participating centres. All IBD cases  
107 met the standard diagnostic criteria for Ulcerative colitis (UC), CD or Inflammatory Bowel  
108 Disease Unclassified (IBDU) following thorough clinical, microbiological, endoscopic,  
109 histological, and radiological evaluation. The Lennard-Jones, Montreal and Paris criteria  
110 were used for diagnosis and classification of clinical phenotypes<sup>14–16</sup>. The control group  
111 consisted of patients with gastrointestinal symptoms (symptomatic controls) who had no  
112 discernible evidence of IBD at any time during follow-up.

113 **Clinical Course in IBD**

114 The primary end-point of treatment escalation was defined as the need for a biologic,  
115 ciclosporin or surgery, instituted for disease flare after initial induction therapy and aiming to  
116 induce disease remission. In UC, the definition of treatment escalation included any patient  
117 requiring colectomy during their index admission.

118 **Sample collection and processing**

119 We collected blood samples prospectively and processed serum within two hours of sampling  
120 (Vacuette® gel tube with clot activator and using centrifugation at 2000G for 10 minutes).  
121 Serum was subsequently stored at  $-80^{\circ}\text{C}$  until further use.

122 We measured protein concentrations using Proximity Extension Assay technology<sup>12</sup>. For each  
123 panel, 92 oligonucleotide-labelled antibody probe pairs are allowed to bind to their respective  
124 target present in the sample. A PCR reporter sequence is formed by a proximity-dependent  
125 DNA polymerization event and is subsequently detected and quantified using real-time PCR.  
126 Four internal controls were included in each multiplex reaction, and negative controls and an  
127 interplate control samples were included on each assay plate.

128 Whole-blood leukocyte DNA was extracted using the Nucleon BACC 3 DNA extraction kit  
129 (GE healthcare, Buckinghamshire, UK). We genotyped patients using the Illumina  
130 OmniExpressExome-8 Bead Chip (Illumina, San Diego, CA, USA).

131

### 132 **IBD Protein Panel Design**

133 We generated a candidate list of IBD genetic risk loci using the published genome-wide  
134 association studies<sup>17,18</sup> and other sources from the literature relevant to IBD biology. After  
135 thorough quality control, assay analyses and validation, we developed a strategy designed to  
136 allow the incorporation of a total of 460 commercially available protein antibodies into five  
137 novel multiplex protein panels comprising proteins involved in IBD-related mechanisms,  
138 such as inflammation, immune regulation, metabolism and cell-cell signalling  
139 (**Supplementary Table 2**). Certain panels including the Inflammatory Olink panel are now  
140 commercially available.

### 141 **Data normalisation and quality control**

142 Raw data (qPCR Ct values) were normalized for technical variation (extension control) and  
143 variation between multiple experimental runs (inter-plate control). The data were then  
144 adjusted with a predetermined correction factor and reported as an arbitrary unit: normalized  
145 protein expression on a log<sub>2</sub> scale as described previously<sup>19</sup>.

146 Limit of detection (LOD) for each protein probe was defined as the mean plus three standard  
147 deviations of the negative controls. For quality control reasons in designing assays, we  
148 excluded 147/460 proteins where >50% of samples were below the LOD and excluded 33  
149 samples in which >20% of the remaining proteins were below the LOD.

### 150 **Statistical analysis**

151 We used R 3.4.4 (R Foundation for Statistical Computing, Vienna, Austria) and Julia 1.1.0<sub>20</sub>  
152 for analysis. Data were corrected for centre batch effects using ComBat. P-values were

153 adjusted for multiple testing (Holm correction)<sup>21</sup>. Survival analysis was performed using Cox  
154 proportional hazard models, and diagnostic analysis with binomial logistic regression. We  
155 constructed models and characterised their predictive performance using a rigorous cross-  
156 validation approach wherein feature selection and parameter estimation were performed in an  
157 inner LOO loop, with the model performance assessed using the unseen outer LOO sample.  
158 Reported performance of the models is based on the combined performance in each outer  
159 LOO sample of the models derived in their respective inner loops. Models were constrained  
160 to include age and sex, with proteins added in a forward stepwise approach based on AIC.  
161 The number of included proteins was based on the AIC evidence ratio assessed in the first  
162 10% of outer loops after which models were constrained to the selected number of proteins to  
163 reduce computation. No pre-selection or filtering of the proteins by any criteria was used  
164 prior to the cross-validation. Classification was based on the optimum threshold from ROC  
165 analysis of the outer cross-validation loop. Randomly permuted data (n=50) were analysed  
166 with the same technique with true data outperforming every permuted dataset.

### 167 **Genotyping and Protein Quantitative trait loci analyses (pQTLs)**

168 Genome Studio files were imported into R for sex mismatch removal, and further analysis.  
169 Protein quantitative trait loci (pQTLs) were found using the matrix eQTL package<sup>22</sup> with a  
170 distance threshold of 300Kb and a MAF threshold of >0.1. Age and sex were included as  
171 covariates, and Holm correction was applied to p values. Further sub-analysis was performed  
172 with treatment exposure, sex, age, BMI, clinical centre, and smoking status as covariates.

### 173 **Ethics Statement**

174 All centres were granted local ethics approval for this study and all patients gave written and  
175 informed consent prior to participating in this study.



## 176 **Results**

### 177 **Differentially expressed protein markers in Inflammatory Bowel Diseases**

178 We designed PEA assays for 313 IBD-related proteins and analysed these in 552 patients  
179 recruited in six IBD centres in Europe between May 2012 and September 2015 (**Table 1**).  
180 Linear models with age and sex as covariates identified a total of 66 protein markers that  
181 showed significant differential expression between IBD (n=328) and controls (n=224, **Figure**  
182 **1 and Supplementary Table 3**) including Matrix Metalloproteinase-12 (MMP-12, log<sub>2</sub>fold  
183 change (log<sub>2</sub>FC) =0.87, Holm p=4.1×10<sup>-23</sup>) and Oncostatin-M (OSM, log<sub>2</sub>FC =0.81,  
184 p=3.7×10<sup>-16</sup>). Over-expression in IBD was more frequent at higher significance levels  
185 (p=0.01), with the top 12 proteins all being over-expressed. Of the proteins down-regulated in  
186 disease the most significant include Growth Arrest-Specific-6 (GAS6) and Integrin alpha-V  
187 (ITGAV).

188 There were 55 protein markers that were significantly differentially expressed in CD  
189 compared to controls (**Supplementary Table 4**); the most significant being CXCL9 (log<sub>2</sub>FC  
190 =1.02, p=5.0×10<sup>-15</sup>) and OSM (log<sub>2</sub>FC =0.82, p=5.8×10<sup>-12</sup>). In ulcerative colitis (UC), 46  
191 protein markers had significant expression differences compared to controls (**Supplementary**  
192 **Table 5**), including MMP-12 (log<sub>2</sub>FC =1.14, p=3.6×10<sup>-26</sup>) and Granzyme-B (log<sub>2</sub>FC =1.54,  
193 p=7.9×10<sup>-23</sup>). A total of 5 proteins showed significant expression differences between UC and  
194 CD (**Supplementary Table 6, Figure 1B**), all were significantly different between CD and  
195 controls, and differed further in the same direction in UC. A clinically useful model to  
196 distinguish between CD and UC could not be established, the best performing classifier  
197 (consisting of age, sex, and expression of six proteins) was only 68.0% accurate. Correlations  
198 between protein expression and inflammatory markers are shown in **Supplementary Figure**  
199 **S1**.

## 200 **Diagnosis of IBD with PEAs and inflammatory markers**

201 We next examined the diagnostic performance of PEA-based protein models using the nested  
202 cross-validation approach, independent of the differential expression analysis. Fitting logistic  
203 regression models comprising age, sex, and 6 protein expression values in a nested cross-  
204 validation approach was 79.8% (95% CI 76.4-83.2) accurate at distinguishing IBD from  
205 controls (sensitivity 83.1%, CI 79.1-87.2; specificity 74.8%, CI 69.0-80.5). The proteins  
206 selected by each inner cross-validation loop were stable, comprising Granzyme-B (selected  
207 by 100% of inner loops), MMP12 (100%), Gas6 (99.8%), IL7 (99.6%), IL8 (99.6%), and  
208 EMMPRIN (99.3%).

209 This approach outperformed an hsCRP-model with age and sex, which had a sensitivity,  
210 specificity and accuracy of 77.5% (72.7-82.3), 27.8% (21.5-34.0) and 57.2% (52.9-61.7)  
211 respectively (Table 3). FC performed better (sensitivity 85.4%, CI 78.1-92.7; specificity  
212 88.4%, CI 78.8-98.0, accuracy 86.4%, CI 80.5-92.2%), however FC suffers from poor  
213 uptake, with only 30.4% of patients having a result between 30 days prior- and 7 days post-  
214 inclusion.

215 The PEA-based models performed similarly in UC and CD (accuracy 78.4 & 77.7%  
216 respectively), and separate analysis of CD and UC did not produce more accurate models. FC  
217 was more sensitive in UC compared to CD (90.7, CI 83.0-98.5 vs 77.4%, CI 62.7-92.1;  $\chi^2$   
218  $p=1.2 \times 10^{-12}$ ), yielding an improved accuracy of 89.7%, CI 83.6-95.7 vs 83.8%, CI 75.4-92.2  
219 (**Table 3**).

## 220 **Individual proteins associated with treatment escalation**

221 In order to identify proteins that associate with treatment escalation, we analysed data from  
222 279 patients with confirmed IBD diagnoses where follow up data were available (**Table 1B**  
223 **and Supplementary Table 7**). Patients who required escalation were younger (median age  
224 28 vs 33,  $p=0.02$ ), more likely to be male (58.2 vs 51.4%,  $\chi^2 p>0.05$ ), and have CD (58.2 vs

225 34.4%,  $\chi^2$   $p=0.004$ ). The association between treatment escalation and smoking status was  
226 not statistically significant in either CD or UC.

227 Cox models were created to identify protein markers individually associated with treatment  
228 escalation in IBD, accounting for age and sex. Fifteen proteins (**Figure 2 and Table 2**) were  
229 significantly associated with treatment escalation in all IBD including ITGAV (Holm  
230  $p=3.2\times 10^{-6}$ ) and EpCAM ( $p=1.7\times 10^{-4}$ ). In UC ( $n=143$ ), 22 proteins were significantly  
231 associated with treatment escalation (**Supplementary Table 8**), but in CD ( $n=112$ ) no  
232 individual proteins achieved significance, although the results were correlated with those  
233 obtained for UC alone ( $r=0.56$ ,  $p=6.6\times 10^{-15}$ ). Adjusting for treatment naivety did not  
234 influence the top differentially expressed proteins.

### 235 **Nested cross-validation stratifies disease sub-groups that associate with treatment** 236 **escalation**

237 Models to define need for treatment escalation consisting of age, sex, IBD subtype, and PEA-  
238 protein expression values were generated in each inner leave-one-out cross-validation loop  
239 and tested in the outer loop. The models selected were highly stable. A series of 5-protein  
240 models had highest predictive accuracy, with 96% of these models consisting of the same 5  
241 proteins (ITGAV, EpCAM, IL18, SLAMF7, and IL8).

242 These models defined by cross-validation were 80.0% (CI 75.3-84.7%) accurate (sensitivity  
243 47.6% [CI 35.3-60.0%], specificity 89.6% [85.5-93.7], with a positive likelihood ratio(LR+)  
244 4.59 [2.86-7.36], and negative likelihood ratio(LR-) 0.58 [0.46-0.74]). The high risk group  
245 required treatment escalation at 3.9 times the rate of the low risk group (CI 2.4-6.3). FC were  
246 higher in patients later requiring treatment escalation (**Table 1**), however this finding was not  
247 significant whether analysing CD ( $p=0.63$ ) and UC (0.09) separately, or in all IBD ( $p=0.14$ ).

248 A simple categorisation for all patients as high or low risk may not be the most useful  
249 interpretation of the protein expression panels. Subgroups can be identified at particularly  
250 high or low risk of aggressive disease tailored to an appropriate level for the intended action  
251 to be taken. As an example, identifying the quartiles of patients at highest and lowest risk  
252 selects a subset where 52.8% and 5.8% respectively required treatment escalation in the first  
253 18 months of treatment, with a relative risk ratio between groups of 9.1 (**Supplementary**  
254 **Figure S2**).

255 Although analysing all IBD patients in this cohort together produces models which work in  
256 both CD and UC, the accuracy achieved in UC is significantly higher than that in CD (85.1%,  
257 CI 79.2-91.0 vs 70.9%, CI 62.4-79.4;  $\chi^2$  p=0.007). The same analytical approach applied  
258 individually to UC and CD produces simpler models (2 and 3 proteins respectively,  
259 **Supplementary Figure S3**), with 79.4% (CI 72.8-86.1) accuracy in UC outperforming  
260 accuracy in CD(76.4% CI 68.4-84.3). As with the pan-IBD analysis, the probes selected by  
261 the inner cross-validation loops were consistent with CD6 and CSF1 in 92% of UC models  
262 and LITAF, CPM, and CCL28 in 99, 97, and 88% of CD models respectively (**Table 3**).

### 263 **Performance of PEA prognostic models against conventional predictors of escalation**

264 We compared the performance of PEA based prognostic proteins to currently available blood  
265 and faecal biomarkers and clinical predictors in IBD and its subtypes; these are summarised  
266 in Table 3. A Cox model trained with FC was highly specific but performed poorly at  
267 positively identifying patients who required treatment escalation (sensitivity 20.0% ,CI 2.5-  
268 37.5; 8.3%, CI 0.0-24.0 in UC and 25% , CI 0.0-55.0 in CD) and suffered from poor uptake  
269 with only 85 FC results available for analysis. The performance of the PEA model is  
270 comparable to hsCRP (HR 2.74, CI:1.32-5.67 vs 6-protein model HR 3.90, CI:2.43-6.26). It  
271 is worth noting however that 149 patients had an hsCRP within the normal range(<5mg/mL).

272 A combined FC and hsCRP model has a poor performance at predicting escalation (HR 0.74,  
273 CI:0.18-3.08). Clinical predictors such as non-B1 behaviour or perianal disease in CD, and  
274 SCCAI or HBI scores did not significantly associate with treatment escalation, though  
275 pancolitis in UC did (uncorrected  $p=0.002$ ).

276 Compared to the overall PEA-protein model accuracy of 80.0%, the addition of FC, CRP, or  
277 both did not improve model performance yielding accuracies of 76.5% (CI 67.5-85.5) 77.8%  
278 (72.8-82.8), and 72.2% (62.3-82.0) respectively, neither did the addition of any phenotypic  
279 characteristic such as pancolitis in UC or perianal disease in CD. We also performed  
280 correlation analyses of the top protein markers with proteins associated with IBD, hsCRP,  
281 albumin, and FC and these are summarised in Supplementary Figure S4.

#### 282 **Circulating proteins associate with germline variation**

283 It has been shown that expression of proteins associate with germline variation, mainly in the  
284 cis regions of their encoding genes<sup>23</sup>. We explored the influence of germline variation on the  
285 expression of key IBD diagnostic and prognostic proteins identified in our analysis. We used  
286 linear regression models with age and sex as covariates, to analyse SNPs (MAF >0.1)  
287 correlated with protein expression, revealing 769 significant cis pQTLs (Holm corrected)  
288 affecting 51 proteins. These included 59 significant cis pQTLs affecting 9 proteins with  
289 significant expression changes associated with IBD, (**Supplementary Figure S5,**  
290 **Supplementary Table 9**), and 35 pQTLs affecting proteins implicated in disease course  
291 (**Supplementary Figures S6**). Vascular Endothelial Growth Factor-A (VEGF-A) showed the  
292 most significant association with genotype (lead SNP rs7767396; effect ( $\beta$ ) -0.42;  
293 MAF=0.46;  $p=8.7\times 10^{-18}$ ) with a total of 6 significant SNP associations and 14 SNPs in  
294 linkage disequilibrium with rs7767396.

295 Among the proteins individually significantly associated with aggressive disease (**Table 2**) or  
296 frequently selected in the multi-protein models for aggressive disease significant pQTLs were  
297 found in CD6, RANK and SLAMF7 (**Supplementary Figure S6**), in addition to the findings  
298 described in CCL23 above (**Supplementary Figure S5**).

## 299 **Discussion**

300 With advances in clinical care in IBD, it is widely recognised that there is a need for  
301 biomarkers that provide accurate diagnostic and prognostic testing in IBD. The key  
302 innovation in this study is the design and evaluation of a novel multi-protein panels in newly  
303 diagnosed IBD, chosen a priori on the basis of known or suspected involvement in  
304 pathogenesis. The results substantiate the involvement of key pathways in pathogenesis, as  
305 well as provide targets for therapy. Importantly, we demonstrate that this strategy of  
306 biomarker discovery is feasible in diagnosis and in predicting treatment escalation in CD and  
307 UC.

308 A panel of 6 proteins had 79.8 % accuracy, 83.1% sensitivity, and 74.8% specificity at  
309 differentiating IBD from controls. Whilst FC did outperform this panel (86.4% accuracy,  
310 85.4% sensitivity, 88.4% specificity), uptake was low, overall with patient acceptability a  
311 major limiting factor. We suggest a serum protein biomarker panel could prove clinically  
312 useful given this widely recognised limitations of FC testing in clinic<sup>10,11</sup> .

313 Of the 66 differentially expressed proteins in IBD, 9 demonstrated germline variation, VEGF-  
314 A being the most significant pQTL. Weaker correlations between protein expression and  
315 genetic variation were observed in 4 of the proteins that predicted treatment escalation  
316 including CCL23, RANK, CD6 and SLAM7. It is yet to be determined whether these genetic  
317 associations are causal in both disease onset and course and our study provide a resource to  
318 investigate these associations further.

319 The greatest unmet need is for biomarkers that can determine disease activity, behaviour and  
320 extent, and most critically to predict response to treatment. In our dataset, we have been able  
321 to characterise and rigorously cross-validate models involving a limited number of proteins  
322 that predict disease course. The role of biomarkers in predicting the disease course has been  
323 the focus of many studies<sup>2-7,24,25</sup>, including our own parallel studies of glycomic and  
324 methylation profiling in the EC-funded consortia<sup>24,26</sup>. Lee *et al* identified expression profiles  
325 of T cell exhaustion in CD8 T cells that predicted treatment escalation in IBD<sup>3</sup>, defining  
326 escalation as the need for 2 or more immunosuppressants and/or surgery after initial disease  
327 remission. A multi-gene signature predicting need for escalation using these original criteria  
328 has been proposed by this team in UC (HR 3.1, 95% CI: 1.25-7.72, p=0.02) and CD (HR 2.7;  
329 CI: 1.32-5.34, p=0.01)<sup>7</sup>. This signature differs from the original profile of T cell exhaustion.  
330 Other studies focus on mucosal healing, response to biological agents, and development of  
331 fistulising or stricturing complications as end-points – all valid in context.

332 In this study we decided to use more stringent criteria for escalation than those used in  
333 defining the transcriptional profile. We highlight need for biologics or ciclosporin or surgical  
334 resection, rather than introduction of immunosuppression per se. This decision regarding end-  
335 point relates principally to the variable threshold for initiating immuno-modulators, which in  
336 practice have often been used as first-line therapy in CD. Our oligo-protein panels have the  
337 potential for clinical translation with significant practical benefits including the simplicity of  
338 the assay, and the ability to multiplex proteins using only 1 $\mu$ L of serum.

339 It is noteworthy that the key prognostic proteins identified relate to pathways independent of  
340 TNF signalling. OSM is a pro-inflammatory cytokine that promotes production of IL-6 to  
341 attract immune cells to the site of inflammation<sup>27</sup> and its intestinal expression in IBD has  
342 been shown to predict anti-TNF non-response in IBD<sup>27</sup>. We report that circulating levels of



343 both IL-6 and OSM can predict treatment escalation in IBD. Similarly, we demonstrate the  
344 involvement of other pathways that predict disease course (**Table 2, Supplementary Figure**  
345 **S7**). Of particular relevance are the proteins that show poor correlation with conventional  
346 inflammatory markers including hsCRP (**Supplementary Figure 4**), in particular PSGL-1.  
347 This protein is a P-selectin glycoprotein ligand that is expressed on the surface of most  
348 immune cells and facilitates immune cell trafficking across the endothelium<sup>28,29</sup>. Drug  
349 targeting PSGL-1 is currently in phase 1 trial for the treatment of CD (NIH #8307272).  
350 Future studies examining the performance of these markers in predicting response to therapy  
351 are now needed.

352 We recognise that clinical decisions and timing on treatment escalations may vary across  
353 centres. In this study all sites utilised a ‘step-up approach’ to treatment escalation, rather than  
354 a top-down approach. In this respect the clinical management is similar across centres and the  
355 consistency of our biomarker profile in predicting need for escalation across centres is  
356 especially noteworthy. Our study was not designed to detect the association between  
357 prognosis and endoscopic activity. Recently, a protein based endoscopic healing index (EHI)  
358 has been reported that incorporates 13 proteins and performs at par with FC in predicting  
359 endoscopic disease remission (validation cohort AUROC, 0.803 for EHI vs AUROC, 0.854  
360 for FC;  $P = .298$ ); highlighting the translational potential of blood-based protein biomarkers  
361 in IBD<sup>30</sup>. Our prognostic protein model performs at par with conventional blood tests such as  
362 hsCRP. Clinicians often make treatment decisions based on these biomarkers, confounding  
363 the performance of hsCRP and albumin in prognostication. It is however worth noting that  
364 149 patients with IBD had an hsCRP within the normal range ( $<5\text{mg/mL}$ ). Furthermore, our  
365 protein markers still remain significant predictors of treatment escalation, independent of  
366 clinical confounders. We have utilised nested leave-one-out cross-validation which is  
367 acknowledged to produce an unbiased estimate of true error when properly nested so that the



368 entire feature selection and parameter tuning process takes place without reference to the left  
369 out samples<sup>31</sup>. Further validation is now needed to replicate our findings in other large multi-  
370 centre inception studies. The significance and impact of our analysis are strengthened by the  
371 pre-established evidence for these proteins in IBD or IBD-related pathways. This is however  
372 the largest inception cohort recruited in biomarker studies in adult IBD to date, allowing  
373 robust modelling and rigorous application.

374 With advances in IBD therapeutics, future challenges will include tailoring therapies based  
375 on individual disease biology. Our data provide an insight into the importance of molecular  
376 characterisation of patients with IBD at diagnosis to tailor medical therapies. With the setup  
377 and initiation of the biomarker-stratified PROFILE trial in CD <sup>25</sup>, the aspiration is that  
378 stratification with multi-omic biomarkers based on underlying disease mechanisms may  
379 enable personalised therapeutics.

380

381  
382 **Author Contributions:** Study design RK, JH, MDA, MV, JS. Patient recruitment and  
383 sample processing NTV, RK, NAK, DB, SV, ATA. Experimental work OA, FH, CP, RK,  
384 NTV, ATA, NAK. Data Analysis RK, NAK, ATA, DR, JL, DB. RK and ATA wrote the  
385 manuscript. All authors were involved in critical review, editing, revision and approval of the  
386 final manuscript.

387 **Conflict of interest:** R. Kalla Financial support for research: EC IBD-Character, Lecture  
388 fee(s): Ferring, N. Kennedy Financial support for research: Wellcome Trust, Conflict with:  
389 Pharmacosmos, Takeda, Janssen, Dr Falk speaker fees. Abbvie, Janssen travel support , A.  
390 Adams: None Declared, J. Satsangi Financial support for research: EC grant IBD-BIOM,

391 Wellcome, CSO, MRC, Conflict with: Consultant for: Takeda, Conflict with: MSD speaker  
392 fees. Shire travelling expenses

393 **Funding:** The study has been funded by the following EU FP7 grant: IBD-CHARACTER  
394 (contract # 2858546). NAK was funded by the Wellcome Trust (grant number  
395 WT097943MA).

396

397

398 **Table 1A:** Patient demographics of patients included in our study of protein expression in  
 399 newly diagnosed inflammatory bowel disease and symptomatic controls.

| Patient Demographics for diagnostic marker discovery   |                                     |                  |
|--------------------------------------------------------|-------------------------------------|------------------|
| Variables                                              | Inflammatory Bowel Diseases (n=328) | Controls (n=224) |
| Mean age (range)                                       | 34(7-78)                            | 34(3-79)         |
| Males (%)                                              | 172 (52%)                           | 104 (46%)        |
| Smoking status (current: never: ex: missing)           | 53:139:107:27                       | 48:100:56:22     |
| High sensitivity c-reactive protein: Median (range)    | 22(0-300)                           | 5(0-85)          |
| Albumin: Median (range)                                | 37(13-50)                           | 40(29-52)        |
| Faecal calprotectin: Median (range)                    | 1298 (32-6001)                      | 78.5 (4-2647)    |
| <b>Subtype IBD</b>                                     |                                     |                  |
| Crohn's Disease                                        | 146 (45%)                           |                  |
| Ulcerative colitis                                     | 153 (47%)                           |                  |
| Inflammatory Bowel Disease Unclassified (IBDU)         | 27 (8%)                             |                  |
| Treatment naïve                                        | 235(72%)                            |                  |
| <b>Montreal classification for CD at Diagnosis</b>     |                                     |                  |
| L1 (terminal ileum)                                    | 46 (32%)                            |                  |
| L2 (colon)                                             | 43 (29%)                            |                  |
| L3 (ileocolon)                                         | 53 (36%)                            |                  |
| L4 (Upper GI)                                          | 4 (3%)                              |                  |
| <b>Montreal Behaviour for CD at Diagnosis</b>          |                                     |                  |
| B1, B1p (non-stricturing & non-penetrating, +perianal) | 111, 6 (76%, 4%)                    |                  |
| B2, B2p (stricturing, +perianal)                       | 12, 0 (8%, 0%)                      |                  |
| B3, B3p (penetrating, +perianal)                       | 7, 6 (5%, 4%)                       |                  |
| Not available                                          | 4 (3%)                              |                  |
| <b>Montreal Extent for UC at Diagnosis</b>             |                                     |                  |
| E1 (proctitis)                                         | 39 (25%)                            |                  |

|                                |          |    |
|--------------------------------|----------|----|
| <b>E2 (left sided)</b>         | 47 (31%) |    |
| <b>E3 (pancolitis)</b>         | 63 (41%) |    |
| <b>Not available</b>           | 4 (3%)   |    |
| <b>Centre</b>                  |          |    |
| <b>Edinburgh, UK</b>           | 107      | 74 |
| <b>Oslo, Norway</b>            | 119      | 60 |
| <b>Orebro, Sweden</b>          | 57       | 30 |
| <b>Linkoping, Sweden</b>       | 16       | 23 |
| <b>Zaragosa, Spain</b>         | 24       | 37 |
| <b>Maastricht, Netherlands</b> | 5        | 0  |

400

401 **Footnote:** NA: Not applicable; CD: Crohn's disease; UC: Ulcerative colitis; IBDU: Inflammatory bowel disease  
402 unclassified.

403

404

405

406

407

408

409

410

411

412

413

414

415

416

417

418

419

420

421

422

423 **Table 1B:** Patient demographics for predicting disease course in Inflammatory Bowel  
 424 Disease

| <b>Inflammatory Bowel Disease</b>                     |                                    |                                     |
|-------------------------------------------------------|------------------------------------|-------------------------------------|
| <b>Variables</b>                                      | <b>IBD escalation group (n=67)</b> | <b>Non-escalation group (n=212)</b> |
| <b>Males (%)</b>                                      | 39(58)                             | 109(51)                             |
| <b>Smoking status (current: never: ex: missing)</b>   | 16:34:16:1                         | 36:98:77:1                          |
| <b>Median FC (range)</b>                              | 1631 (35-6001)                     | 1186 (32-6001)                      |
| <b>Median age (range)</b>                             | 28(18-67)                          | 33(18-77)                           |
| <b>Edin: Norway: Sweden: Spain</b>                    | 26:22:15:4                         | 81:71:41:19                         |
| <b>Disease subtype</b>                                |                                    |                                     |
| <b>Crohn's disease</b>                                | 39                                 | 73                                  |
| <b>Ulcerative colitis</b>                             | 26                                 | 117                                 |
| <b>Inflammatory bowel disease unclassified (IBDU)</b> | 2                                  | 22                                  |

425

| <b>Ulcerative Colitis</b>                           |                                |                                     |
|-----------------------------------------------------|--------------------------------|-------------------------------------|
| <b>Variables</b>                                    | <b>Escalation group (n=26)</b> | <b>Non-escalation group (n=117)</b> |
| <b>Males (%)</b>                                    | 19(73)                         | 67(57)                              |
| <b>Smoking status (current: never: ex: missing)</b> | 3:9:14:0                       | 8:53:56:0                           |
| <b>Median FC (range)</b>                            | 3778 (35-6001)                 | 1367 (32-6001)                      |
| <b>Median age (range)</b>                           | 30(18-60)                      | 37(18-77)                           |
| <b>Edin: Norway: Sweden: Spain</b>                  | 13:8:4:1                       | 39:52:19:7                          |
| <b>Paris Extent for UC</b>                          |                                |                                     |
| <b>E1 (proctitis)</b>                               | 0                              | 38 (32%)                            |
| <b>E2 (left sided)</b>                              | 7 (27%)                        | 37 (32%)                            |
| <b>E3 (pancolitis)</b>                              | 19 (73%)                       | 42 (36%)                            |

426

427

428

| <b>Crohn's Disease</b>                                            |                                |                                    |
|-------------------------------------------------------------------|--------------------------------|------------------------------------|
| <b>Variables</b>                                                  | <b>Escalation group (n=39)</b> | <b>Non-escalation group (n=73)</b> |
| <b>Males (%)</b>                                                  | 19(49)                         | 33(45)                             |
| <b>Smoking status (current: never: ex: missing)</b>               | 13:5:20:1                      | 26:18:28:1                         |
| <b>Median FC (range)</b>                                          | 1398.5 (47-6001)               | 825 (70-6001)                      |
| <b>Median age (range)</b>                                         | 25(18-66)                      | 29(18-73)                          |
| <b>Edin: Norway: Sweden: Spain</b>                                | 11:14:11:3                     | 34:17:12:10                        |
| <b>Montreal classification for CD</b>                             |                                |                                    |
| <b>L1 (terminal ileum)</b>                                        | 13 (33%)                       | 25 (34%)                           |
| <b>L2 (colonic)</b>                                               | 9 (23%)                        | 22 (30%)                           |
| <b>L3 (ileocolon)</b>                                             | 17 (44%)                       | 25 (34%)                           |
| <b>L4 (upper GI)</b>                                              | 0                              | 1 (1%)                             |
| <b>Montreal Behaviour for CD</b>                                  |                                |                                    |
| <b>B1, B1p (non-stricturing &amp; non-penetrating, +perianal)</b> | 29, 0 (74%, 0%)                | 55, 6 (75%, 8%)                    |
| <b>B2, B2p (stricturing, +perianal)</b>                           | 6, 0 (15%, 0%)                 | 4, 0 (5%, 0%)                      |
| <b>B3, B3p (penetrating, +perianal)</b>                           | 2, 2 (5%, 5%)                  | 5, 1 (7%, 1%)                      |
| <b>Not available</b>                                              | 0                              | 2 (3%)                             |

429  
430

431 **Table 2:** Top 15 proteins associated with escalation in treatment (anti-TNF/ciclosporin  
 432 and/or surgery) and their associated biology based on the available literature. Holm P  
 433 represents p values adjusted for multiple testing. HR (hazard ratio) is the relative risk  
 434 associated with a one unit increase in expression of the relevant protein, IQR HR shows the  
 435 hazard ratio associated with moving between the 25<sup>th</sup> and 75<sup>th</sup> percentile of expression in the  
 436 direction of increased risk.

| Protein | P value               | HR   | IQR HR | Holm P value          | Family / Group      | Cell of origin            | Function/ Relevance in IBD                                                             |
|---------|-----------------------|------|--------|-----------------------|---------------------|---------------------------|----------------------------------------------------------------------------------------|
| ITGAV   | $1.01 \times 10^{-8}$ | 0.23 | 6.13   | $3.16 \times 10^{-6}$ | Integrin signalling | NA                        | Known GWAS locus <sup>32</sup>                                                         |
| IL-1RA  | $7.46 \times 10^{-8}$ | 2.02 | 2.61   | $2.33 \times 10^{-5}$ | IL-1                | Macrophages and monocytes | Anti-IL1 drug in phase 2 trial in UC (ISRCTN43717130)                                  |
| EpCAM   | $5.59 \times 10^{-7}$ | 0.49 | 1.35   | $1.74 \times 10^{-4}$ | NA                  | Epithelial cells          | Intercellular adhesion molecule, maintaining intestinal immune balance <sup>33</sup> . |
| IL-6    | $9.85 \times 10^{-7}$ | 1.37 | 2.61   | $3.05 \times 10^{-4}$ | IL-6 family         | Th cells and macrophages  | Pro-inflammatory response via IL1 $\beta$ and TNF                                      |
| OSM     | $1.45 \times 10^{-6}$ | 1.85 | 2.67   | $4.49 \times 10^{-4}$ | IL-6                | Th cells and macrophages  | Pro-inflammatory response and anti-TNF non-response <sup>27</sup>                      |
| HGF     | $2.51 \times 10^{-6}$ | 1.76 | 1.90   | $7.74 \times 10^{-4}$ | Cytokine            | Mesenchymal cells         | Angiogenesis promotion and elevated levels in IBD <sup>34</sup>                        |

|        |                       |      |      |                       |                                |                                          |                                                                               |
|--------|-----------------------|------|------|-----------------------|--------------------------------|------------------------------------------|-------------------------------------------------------------------------------|
| IL-18  | $1.01 \times 10^{-5}$ | 2.27 | 2.08 | $3.10 \times 10^{-3}$ | IL-1 family                    | Epithelial cells                         | IL-18 polymorphism associates with anti-TNF response <sup>35</sup>            |
| PSGL1  | $1.07 \times 10^{-5}$ | 0.13 | 24.3 | $3.28 \times 10^{-3}$ | Selectin family                | Leucocyte and endothelial surfaces       | Anti-PSGL-1 drug in Phase 1 trial to treat CD (NIH #8307272)                  |
| ADM    | $1.16 \times 10^{-5}$ | 2.03 | 2.04 | $3.53 \times 10^{-3}$ | Calcitonin peptide superfamily | Epithelial cells                         | Case series of mucosal healing in refractory UC with AM therapy <sup>36</sup> |
| CSF-1  | $1.20 \times 10^{-5}$ | 2.06 | 2.14 | $3.64 \times 10^{-3}$ | IL-34/CSF-1 family             | Various immune cells                     | Pro-inflammatory macrophage induced response <sup>37</sup>                    |
| TNF-R1 | $1.89 \times 10^{-5}$ | 2.31 | 2.17 | $5.74 \times 10^{-3}$ | TNF family                     | Macrophages and dendritic cells          | Pro-inflammatory TNF mediated response                                        |
| CCL23  | $5.38 \times 10^{-5}$ | 1.75 | 1.97 | 0.016                 | CC chemokines                  | Epithelial and immune cells              | Neutrophil activation and leukocyte migration <sup>38</sup>                   |
| IL-8   | $6.98 \times 10^{-5}$ | 1.43 | 2.16 | 0.021                 | CXC-chemokines                 | Epithelial cells, macrophages, monocytes | Neutrophil recruitment and pro-inflammatory response                          |
| CPM    | $7.64 \times 10^{-5}$ | 0.31 | 5.49 | 0.023                 | Carboxy peptidases             | Activated macrophages                    | Activated macrophage differentiating marker <sup>39</sup>                     |
| IL-17D | $1.22 \times 10^{-4}$ | 0.21 | 11.3 | 0.036                 | IL-17 family                   | Th-17 cells                              | Th-17 driven pro-inflammatory cytokine                                        |



439 **Table 3:** Comparisons of the diagnostic and prognostic performances of Proximity Extension  
440 Assay (PEA) based models versus conventional blood tests, faecal markers and clinical  
441 predictors of disease. Sens: sensitivity; spec: specificity; acc: accuracy; LRpos: positive  
442 likelihood ratio; LRneg: negative likelihood ratio; HR: hazards ratio; IBD: Inflammatory  
443 bowel disease; CD: Crohn's disease; UC: Ulcerative colitis; FC: faecal calprotectin; CRP:  
444 high sensitivity c-reactive protein.

445

446

447

448

449

450

451

452

453

454

| IBD diagnosis: 6 proteins |          |           |       |                   |                  |
|---------------------------|----------|-----------|-------|-------------------|------------------|
|                           | Low risk | High risk | Total |                   |                  |
| IBD <sub>no</sub>         | 163      | 55        | 218   | sens              | 0.83 (79.1–87.2) |
| IBD <sub>yes</sub>        | 55       | 271       | 326   | spec              | 0.75 (69.0–80.5) |
| Total                     | 218      | 326       | 544   | acc               | 0.80 (76.4–83.2) |
|                           |          |           |       | LR <sub>pos</sub> | 3.30 2.61–4.16   |
|                           |          |           |       | LR <sub>neg</sub> | 0.23 0.18–0.29   |
|                           |          |           |       | HR                | 3.29 2.61–4.16   |

| IBD diagnosis: CRP |          |           |       |                   |                  |
|--------------------|----------|-----------|-------|-------------------|------------------|
|                    | Low risk | High risk | Total |                   |                  |
| IBD <sub>no</sub>  | 55       | 143       | 198   | sens              | 0.78 (72.7–82.3) |
| IBD <sub>yes</sub> | 65       | 224       | 289   | spec              | 0.28 (21.5–34.0) |
| Total              | 120      | 367       | 487   | acc               | 0.57 (52.9–61.7) |
|                    |          |           |       | LR <sub>pos</sub> | 1.07 0.96–1.19   |
|                    |          |           |       | LR <sub>neg</sub> | 0.81 0.59–1.10   |
|                    |          |           |       | HR                | 1.12 1.01–1.25   |

| IBD diagnosis: FC  |          |           |       |                   |                  |
|--------------------|----------|-----------|-------|-------------------|------------------|
|                    | Low risk | High risk | Total |                   |                  |
| IBD <sub>no</sub>  | 38       | 5         | 43    | sens              | 0.85 (78.1–92.7) |
| IBD <sub>yes</sub> | 13       | 76        | 89    | spec              | 0.88 (78.8–98.0) |
| Total              | 51       | 81        | 132   | acc               | 0.86 (80.5–92.2) |
|                    |          |           |       | LR <sub>pos</sub> | 7.34 3.21–16.8   |
|                    |          |           |       | LR <sub>neg</sub> | 0.17 0.10–0.28   |
|                    |          |           |       | HR                | 3.68 1.61–8.43   |

| IBD diagnosis: FC & CRP |          |           |       |                   |                  |
|-------------------------|----------|-----------|-------|-------------------|------------------|
|                         | Low risk | High risk | Total |                   |                  |
| IBD <sub>no</sub>       | 38       | 5         | 43    | sens              | 0.87 (79.5–94.0) |
| IBD <sub>yes</sub>      | 11       | 72        | 83    | spec              | 0.88 (78.8–98.0) |
| Total                   | 49       | 77        | 126   | acc               | 0.87 (81.5–93.1) |
|                         |          |           |       | LR <sub>pos</sub> | 7.46 3.26–17.1   |
|                         |          |           |       | LR <sub>neg</sub> | 0.15 0.09–0.26   |
|                         |          |           |       | HR                | 4.16 1.82–9.54   |

| CD diagnosis: CRP |          |           |       |                   |                  |
|-------------------|----------|-----------|-------|-------------------|------------------|
|                   | Low risk | High risk | Total |                   |                  |
| CD <sub>no</sub>  | 55       | 143       | 198   | sens              | 0.79 (71.7–86.3) |
| CD <sub>yes</sub> | 25       | 94        | 119   | spec              | 0.28 (21.5–34.0) |
| Total             | 80       | 237       | 317   | acc               | 0.47 (41.5–52.5) |
|                   |          |           |       | LR <sub>pos</sub> | 1.09 0.96–1.24   |
|                   |          |           |       | LR <sub>neg</sub> | 0.76 0.50–1.14   |
|                   |          |           |       | HR                | 1.27 1.12–1.44   |

| CD diagnosis: FC  |          |           |       |                   |                  |
|-------------------|----------|-----------|-------|-------------------|------------------|
|                   | Low risk | High risk | Total |                   |                  |
| CD <sub>no</sub>  | 38       | 5         | 43    | sens              | 0.77 (62.7–92.1) |
| CD <sub>yes</sub> | 7        | 24        | 31    | spec              | 0.88 (78.8–98.0) |
| Total             | 45       | 29        | 74    | acc               | 0.84 (75.4–92.2) |
|                   |          |           |       | LR <sub>pos</sub> | 6.66 2.86–15.5   |
|                   |          |           |       | LR <sub>neg</sub> | 0.26 0.13–0.49   |
|                   |          |           |       | HR                | 5.32 2.28–12.4   |

| CD diagnosis: FC & CRP |          |           |       | sens              | 0.79 | (63.7–93.8) |
|------------------------|----------|-----------|-------|-------------------|------|-------------|
|                        | Low risk | High risk | Total | spec              | 0.88 | (78.8–98.0) |
| CD <sub>no</sub>       | 38       | 5         | 43    | acc               | 0.85 | (76.1–92.9) |
| CD <sub>yes</sub>      | 6        | 22        | 28    | LR <sub>pos</sub> | 6.76 | 2.90–15.8   |
| Total                  | 44       | 27        | 71    | LR <sub>neg</sub> | 0.24 | 0.12–0.50   |
|                        |          |           |       | HR                | 5.98 | 2.56–13.9   |

| UC diagnosis: CRP |          |           |       | sens              | 0.79 | (71.9–85.3) |
|-------------------|----------|-----------|-------|-------------------|------|-------------|
|                   | Low risk | High risk | Total | spec              | 0.28 | (21.5–34.0) |
| UC <sub>no</sub>  | 55       | 143       | 198   | acc               | 0.49 | (44.0–54.6) |
| UC <sub>yes</sub> | 31       | 114       | 145   | LR <sub>pos</sub> | 1.09 | 0.96–1.23   |
| Total             | 86       | 257       | 343   | LR <sub>neg</sub> | 0.77 | 0.52–1.13   |
|                   |          |           |       | HR                | 1.23 | 1.09–1.39   |

| UC diagnosis: FC  |          |           |       | sens              | 0.91 | (83.0–98.5) |
|-------------------|----------|-----------|-------|-------------------|------|-------------|
|                   | Low risk | High risk | Total | spec              | 0.88 | (78.8–98.0) |
| UC <sub>no</sub>  | 38       | 5         | 43    | acc               | 0.90 | (83.6–95.7) |
| UC <sub>yes</sub> | 5        | 49        | 54    | LR <sub>pos</sub> | 7.80 | 3.41–17.9   |
| Total             | 43       | 54        | 97    | LR <sub>neg</sub> | 0.11 | 0.05–0.24   |
|                   |          |           |       | HR                | 7.80 | 3.41–17.9   |

| UC diagnosis: FC & CRP |          |           |       | sens              | 0.92 | (84.8–99.5) |
|------------------------|----------|-----------|-------|-------------------|------|-------------|
|                        | Low risk | High risk | Total | spec              | 0.88 | (78.8–98.0) |
| UC <sub>no</sub>       | 38       | 5         | 43    | acc               | 0.90 | (84.5–96.4) |
| UC <sub>yes</sub>      | 4        | 47        | 51    | LR <sub>pos</sub> | 7.93 | 3.46–18.1   |
| Total                  | 42       | 52        | 94    | LR <sub>neg</sub> | 0.09 | 0.03–0.23   |
|                        |          |           |       | HR                | 9.49 | 4.15–21.7   |

| Detect UC from all IBD |          |           |       | sens              | 0.72 | (64.8–79.0) |
|------------------------|----------|-----------|-------|-------------------|------|-------------|
|                        | Low risk | High risk | Total | spec              | 0.69 | (61.7–76.7) |
| UC <sub>no</sub>       | 101      | 45        | 146   | acc               | 0.71 | (65.4–75.7) |
| UC <sub>yes</sub>      | 43       | 110       | 153   | LR <sub>pos</sub> | 2.33 | 1.79–3.03   |
| Total                  | 144      | 155       | 299   | LR <sub>neg</sub> | 0.41 | 0.31–0.54   |
|                        |          |           |       | HR                | 2.38 | 1.83–3.09   |

| Escalation (IBD): FC |          |           |       | sens              | 0.20 | ( 2.5–37.5) |
|----------------------|----------|-----------|-------|-------------------|------|-------------|
|                      | Low risk | High risk | Total | spec              | 0.83 | (74.0–92.2) |
| Esc <sub>no</sub>    | 54       | 11        | 65    | acc               | 0.68 | (58.3–78.1) |
| Esc <sub>yes</sub>   | 16       | 4         | 20    | LR <sub>pos</sub> | 1.18 | 0.42–3.31   |
| Total                | 70       | 15        | 85    | LR <sub>neg</sub> | 0.96 | 0.75–1.23   |
|                      |          |           |       | HR                | 9.49 | 4.15–21.7   |

| Escalation (IBD): CRP |          |           |       | sens              | 0.22 | (11.7–33.1) |
|-----------------------|----------|-----------|-------|-------------------|------|-------------|
|                       | Low risk | High risk | Total | spec              | 0.94 | (90.9–97.3) |
| Escno                 | 192      | 12        | 204   | acc               | 0.78 | (73.2–83.2) |
| Escyes                | 45       | 13        | 58    | LR <sub>pos</sub> | 3.81 | 1.84–7.89   |
| Total                 | 237      | 25        | 262   | LR <sub>neg</sub> | 0.82 | 0.71–0.95   |
|                       |          |           |       | HR                | 2.74 | 1.32–5.67   |

---

| Escalation (IBD): FC & CRP |          |           |       | sens              | 0.12 | ( 0.0–27.1) |
|----------------------------|----------|-----------|-------|-------------------|------|-------------|
|                            | Low risk | High risk | Total | spec              | 0.84 | (74.7–97.0) |
| Escno                      | 52       | 10        | 62    | acc               | 0.68 | (58.1–78.6) |
| Escyes                     | 15       | 2         | 17    | LR <sub>pos</sub> | 0.73 | 0.18–3.02   |
| Total                      | 67       | 12        | 79    | LR <sub>neg</sub> | 1.05 | 0.86–1.29   |
|                            |          |           |       | HR                | 0.74 | 0.18–3.08   |

---

| Escalation (CD): 3 Proteins |          |           |       | sens              | 0.59 | (43.5–74.4) |
|-----------------------------|----------|-----------|-------|-------------------|------|-------------|
|                             | Low risk | High risk | Total | spec              | 0.86 | (77.8–94.0) |
| Escno                       | 61       | 10        | 71    | acc               | 0.76 | (68.4–84.3) |
| Escyes                      | 16       | 23        | 39    | LR <sub>pos</sub> | 4.19 | 2.23–7.87   |
| Total                       | 77       | 33        | 110   | LR <sub>neg</sub> | 0.48 | 0.32–0.70   |
|                             |          |           |       | HR                | 3.35 | 1.78–6.31   |

---

| Escalation (UC): 2 Proteins |          |           |       | sens              | 0.15 | ( 1.5–29.3) |
|-----------------------------|----------|-----------|-------|-------------------|------|-------------|
|                             | Low risk | High risk | Total | spec              | 0.94 | (89.5–98.3) |
| Escno                       | 108      | 7         | 115   | acc               | 0.79 | (72.8–86.1) |
| Escyes                      | 22       | 4         | 26    | LR <sub>pos</sub> | 2.53 | 0.80–8.00   |
| Total                       | 130      | 11        | 141   | LR <sub>neg</sub> | 0.90 | 0.76–1.07   |
|                             |          |           |       | HR                | 2.18 | 0.68–6.80   |

---

| Escalation (IBD): 6 Proteins |          |           |       | sens              | 0.48 | (35.3–60.0) |
|------------------------------|----------|-----------|-------|-------------------|------|-------------|
|                              | Low risk | High risk | Total | spec              | 0.90 | (85.5–93.7) |
| Escno                        | 190      | 22        | 212   | acc               | 0.80 | (75.3–84.7) |
| Escyes                       | 33       | 30        | 63    | LR <sub>pos</sub> | 4.59 | 2.86–7.36   |
| Total                        | 223      | 52        | 275   | LR <sub>neg</sub> | 0.58 | 0.46–0.74   |
|                              |          |           |       | HR                | 3.90 | 2.43–6.26   |

---

| 6 protein IBD esc model on CD |          |           |       | sens              | 0.51 | (34.9–68.8) |
|-------------------------------|----------|-----------|-------|-------------------|------|-------------|
|                               | Low risk | High risk | Total | spec              | 0.80 | (70.9–89.1) |
| Escno                         | 60       | 15        | 75    | acc               | 0.71 | (62.4–79.4) |
| Escyes                        | 17       | 18        | 35    | LR <sub>pos</sub> | 2.57 | 1.48–4.48   |
| Total                         | 77       | 33        | 110   | LR <sub>neg</sub> | 0.61 | 0.42–0.87   |
|                               |          |           |       | HR                | 2.47 | 1.42–4.31   |

| 6 protein IBD esc model on UC |          |           |       | sens              | 0.46 | (27.0–65.3) |
|-------------------------------|----------|-----------|-------|-------------------|------|-------------|
|                               | Low risk | High risk | Total | spec              | 0.94 | (89.5–98.3) |
| Escno                         | 108      | 7         | 115   | acc               | 0.85 | (79.2–91.0) |
| Escyes                        | 14       | 12        | 26    | LR <sub>pos</sub> | 7.58 | 3.31–17.4   |
| Total                         | 122      | 19        | 141   | LR <sub>neg</sub> | 0.57 | 0.40–0.82   |
|                               |          |           |       | HR                | 5.50 | 2.40–12.6   |

---

| Escalation (UC): FC |          |           |       | sens              | 0.08 | ( 0.0–24.0) |
|---------------------|----------|-----------|-------|-------------------|------|-------------|
|                     | Low risk | High risk | Total | spec              | 0.83 | (72.1–94.6) |
| Escno               | 35       | 7         | 42    | acc               | 0.67 | (54.1–89.2) |
| Escyes              | 11       | 1         | 12    | LR <sub>pos</sub> | 0.50 | 0.07–3.67   |
| Total               | 46       | 8         | 54    | LR <sub>neg</sub> | 1.10 | 0.88–1.37   |
|                     |          |           |       | HR                | 0.52 | 0.07–3.84   |

---

| Escalation (CD): FC |          |           |       | sens              | 0.25 | ( 0.0–55.0) |
|---------------------|----------|-----------|-------|-------------------|------|-------------|
|                     | Low risk | High risk | Total | spec              | 0.75 | (56.0–94.0) |
| Escno               | 15       | 5         | 20    | acc               | 0.61 | (42.6–78.8) |
| Escyes              | 6        | 2         | 8     | LR <sub>pos</sub> | 1.00 | 0.24–4.14   |
| Total               | 21       | 7         | 28    | LR <sub>neg</sub> | 1.00 | 0.62–1.61   |
|                     |          |           |       | HR                | 1.00 | 0.24–4.14   |

---

| Escalation (IBD): 6 Proteins & FC |          |           |       | sens              | 0.48 | (26.3–69.0) |
|-----------------------------------|----------|-----------|-------|-------------------|------|-------------|
|                                   | Low risk | High risk | Total | spec              | 0.86 | (77.4–94.5) |
| Escno                             | 55       | 9         | 64    | acc               | 0.77 | (67.5–85.5) |
| Escyes                            | 11       | 10        | 21    | LR <sub>pos</sub> | 3.39 | 1.59–7.20   |
| Total                             | 66       | 19        | 85    | LR <sub>neg</sub> | 0.61 | 0.40–0.93   |
|                                   |          |           |       | HR                | 3.16 | 1.49–6.71   |

---

| Escalation (IBD): 6 Proteins & CRP |          |           |       | sens              | 0.38 | (25.5–49.9) |
|------------------------------------|----------|-----------|-------|-------------------|------|-------------|
|                                    | Low risk | High risk | Total | spec              | 0.90 | (85.6–93.9) |
| Escno                              | 184      | 21        | 205   | acc               | 0.78 | (72.8–82.8) |
| Escyes                             | 38       | 23        | 61    | LR <sub>pos</sub> | 3.68 | 2.19–6.18   |
| Total                              | 222      | 44        | 266   | LR <sub>neg</sub> | 0.69 | 0.57–0.85   |
|                                    |          |           |       | HR                | 3.05 | 1.82–5.13   |

---

| Escalation (IBD): 6 Proteins, FC & CRP |          |           |       | sens              | 0.33 | (11.6–55.1) |
|----------------------------------------|----------|-----------|-------|-------------------|------|-------------|
|                                        | Low risk | High risk | Total | spec              | 0.84 | (74.3–92.9) |
| Escno                                  | 51       | 10        | 61    | acc               | 0.72 | (62.3–82.0) |
| Escyes                                 | 12       | 6         | 18    | LR <sub>pos</sub> | 2.03 | 0.86–4.83   |
| Total                                  | 63       | 16        | 79    | LR <sub>neg</sub> | 0.80 | 0.56–1.13   |
|                                        |          |           |       | HR                | 1.97 | 0.93–4.68   |

## 455 **Figure Legends**

456 **Figure 1:** A) Volcano plot displaying the  $\log_2$  fold-change and significance of protein associations with IBD.

457 Dotted line indicates threshold for significance after Holm correction. B) Fold change between Ulcerative  
458 colitis(UC) and Crohn's disease(CD) respectively vs controls, points coloured by significance after Holm  
459 correction in CD, UC, both, or neither (ns).

460 **Figure 2:** The significance of protein markers in predicting treatment escalation in Inflammatory Bowel Disease  
461 and Ulcerative colitis. Significance threshold after Holm correction indicated by dotted line.

462 **Supplementary Figure S1:** Heatmap showing correlation coefficients of PEA assays with high sensitivity C-  
463 reactive protein (hsCRP), albumin (Alb) in the entire cohort. Colour shows absolute correlation and figures  
464 show relative correlation.

465 **Supplementary Figure S2:** Each subsection represents the results from labelling a proportion of the population  
466 as low (x axis) and high risk (y axis). Within each subsection the top left and bottom right numbers denote the  
467 percentage of the identified group requiring escalated treatment in the high and low risk groups respectively.  
468 The top right number in each subsection represents the relative risk between groups. The equivalent results  
469 obtained by categorisation based on optimum ROC thresholds are: 22.9% high risk with 47.6% escalation,  
470 77.1% low risk with 10.4% escalation, relative risk = 4.6 (95% CI 2.9-7.4)

471 **Supplementary Figure S3:** Kaplan-Meier survival graphs showing stratification of CD and UC patients by 3  
472 and 2 PEA assays respectively into groups at high and low risk of treatment escalation.

473 **Supplementary Figure S4:** Heatmap showing hierarchical clustering by absolute correlation (Spearman)  
474 between top 66 differentially expressed proteins, escalation-associated proteins, high sensitivity C-reactive  
475 protein (hsCRP), albumin(Alb), and faecal calprotectin (FCP). Colour shows absolute correlation and figures  
476 show relative correlation.

477 **Supplementary Figure S5:** All proteins where there is a significant association between expression and disease  
478 status, and cis pQTLs with SNPs within 300Kb.

479 **Supplementary Figure S6:** All proteins associated with escalation (individually or in the stepwise constructed  
480 models) with cis pQTLs with SNPs within 300Kb.

481 **Supplementary Figure S7:** Heatmap summarising the associations of the top differentially expressed  
482 prognostic proteins to the cell-specific Cap Analysis of Gene Expression (CAGE) peaks derived using the  
483 FANTOM 5 dataset<sup>40</sup>. Markers that predict disease course, cluster into distinct groups based on their expression  
484 in cell lines within the FANTOM-5 dataset. These include protein markers that associate with the innate  
485 immune system such as macrophages and mast cells (IL-18, IL-1RA, CCL23, CSF-1) and a distinct group of  
486 proteins that are primarily expressed in monocytes (IL-6, ITGAV).

487

488

489

490

491

492

493

494

495

496

497

498

499

## 500 References

- 501 1. Boyapati RK., Kalla R., Satsangi J., Ho G-T. Biomarkers in Search of Precision Medicine in  
502 IBD. *Am J Gastroenterol* 2016;**111**(12):1682–90. Doi: 10.1038/ajg.2016.441.
- 503 2. Kalla R., Kennedy NA., Ventham NT., Boyapati RK., Adams AT., Nimmo ER., et al. Serum  
504 Calprotectin: A Novel Diagnostic and Prognostic Marker in Inflammatory Bowel Diseases. *Am*  
505 *J Gastroenterol* 2016;**111**(12):1796–805. Doi: 10.1038/ajg.2016.342.
- 506 3. Lee JC., Lyons P a., McKinney EF., Sowerby JM., Carr EJ., Bredin F., et al. Gene expression  
507 profiling of CD8+ T cells predicts prognosis in patients with Crohn disease and ulcerative  
508 colitis. *J Clin Invest* 2011;**121**(10):4170–9. Doi: 10.1172/JCI59255.
- 509 4. Lee JC., Biasci D., Roberts R., Geary RB., Mansfield JC., Ahmad T., et al. Genome-wide  
510 association study identifies distinct genetic contributions to prognosis and susceptibility in  
511 Crohn’s disease. *Nat Genet* 2017;**49**(2):262–8. Doi: 10.1038/ng.3755.
- 512 5. Kugathasan S., Denson LA., Walters TD., Kim M-O., Marigorta UM., Schirmer M., et al.  
513 Prediction of complicated disease course for children newly diagnosed with Crohn’s disease: a  
514 multicentre inception cohort study. *Lancet (London, England)* 2017;**389**(10080):1710–8. Doi:  
515 10.1016/S0140-6736(17)30317-3.
- 516 6. Marigorta UM., Denson LA., Hyams JS., Mondal K., Prince J., Walters TD., et al.  
517 Transcriptional risk scores link GWAS to eQTLs and predict complications in Crohn’s  
518 disease. *Nat Genet* 2017;**49**(10):1517–21. Doi: 10.1038/ng.3936.
- 519 7. Biasci D., Lee JC., Noor NM., Pombal DR., Hou M., Lewis N., et al. A blood-based  
520 prognostic biomarker in IBD. *Gut* 2019;**68**(8):1386–95. Doi: 10.1136/gutjnl-2019-318343.
- 521 8. Colombel J-F., Panaccione R., Bossuyt P., Lukas M., Baert F., Vaňásek T., et al. Effect of  
522 tight control management on Crohn’s disease (CALM): a multicentre, randomised, controlled  
523 phase 3 trial. *Lancet* 2017;**390**(10114):2779–89. Doi: 10.1016/S0140-6736(17)32641-7.
- 524 9. van Rheenen PF., Van de Vijver E., Fidler V. Faecal calprotectin for screening of patients with  
525 suspected inflammatory bowel disease: diagnostic meta-analysis. *BMJ* 2010;**341**:c3369.



- 526 10. Kalla R., Boyapati R., Vatn S., Hijos G., Crooks B., Moore GT., et al. Patients' perceptions of  
527 faecal calprotectin testing in inflammatory bowel disease: results from a prospective  
528 multicentre patient-based survey. *Scand J Gastroenterol* 2018;1–6. Doi:  
529 10.1080/00365521.2018.1527394.
- 530 11. Maréchal C., Aimone-Gastin I., Baumann C., Dirrenberger B., Guéant J-L., Peyrin-Biroulet L.  
531 Compliance with the faecal calprotectin test in patients with inflammatory bowel disease.  
532 *United Eur Gastroenterol J* 2017;205064061668651. Doi: 10.1177/2050640616686517.
- 533 12. Assarsson E., Lundberg M., Holmquist G., Björkesten J., Thorsen SB., Ekman D., et al.  
534 Homogenous 96-plex PEA immunoassay exhibiting high sensitivity, specificity, and excellent  
535 scalability. *PLoS One* 2014;**9**(4):e95192. Doi: 10.1371/journal.pone.0095192.
- 536 13. Lundberg M., Eriksson A., Tran B., Assarsson E., Fredriksson S. Homogeneous antibody-  
537 based proximity extension assays provide sensitive and specific detection of low-abundant  
538 proteins in human blood. *Nucleic Acids Res* 2011;**39**(15):e102. Doi: 10.1093/nar/gkr424.
- 539 14. Lennard-Jones JE. Classification of inflammatory bowel disease. *Scand J Gastroenterol Suppl*  
540 1989;**170**:2–6; discussion 16-9.
- 541 15. Satsangi J., Silverberg MS., Vermeire S., Colombel J-F. The Montreal classification of  
542 inflammatory bowel disease: controversies, consensus, and implications. *Gut* 2006;**55**(6):749–  
543 53. Doi: 10.1136/gut.2005.082909.
- 544 16. Levine A., Griffiths A., Markowitz J., Wilson DC., Turner D., Russell RK., et al. Pediatric  
545 modification of the Montreal classification for inflammatory bowel disease: the Paris  
546 classification. *Inflamm Bowel Dis* 2011;**17**(6):1314–21. Doi: 10.1002/ibd.21493.
- 547 17. Jostins L., Ripke S., Weersma RK., Duerr RH., McGovern DP., Hui KY., et al. Host-microbe  
548 interactions have shaped the genetic architecture of inflammatory bowel disease. *Nature*  
549 2012;**491**(7422):119–24. Doi: 10.1038/nature11582.
- 550 18. Franke A., McGovern DPB., Barrett JC., Wang K., Graham L., Ahmad T., et al. Meta-Analysis  
551 Increases to 71 the Tally of Confirmed Crohn's Disease Susceptibility Loci. *Nat Genet*

- 552 2010;**42**(12):1118–25. Doi: 10.1038/ng.717.Meta-Analysis.
- 553 19. Lind L., Ärnlov J., Lindahl B., Siegbahn A., Sundström J., Ingelsson E. Use of a proximity  
554 extension assay proteomics chip to discover new biomarkers for human atherosclerosis.  
555 *Atherosclerosis* 2015;**242**(1):205–10. Doi: 10.1016/j.atherosclerosis.2015.07.023.
- 556 20. Bezanson J., Edelman A., Karpinski S., Shah VB. Julia: A Fresh Approach to Numerical  
557 Computing. *SIAM Rev* 2017;**59**(1):65–98. Doi: 10.1137/141000671.
- 558 21. Holm S. A simple sequentially rejective multiple test procedure. *Scand J Stat* 1979;**6**(2):65–  
559 70.
- 560 22. Shabalín AA. Matrix eQTL: ultra fast eQTL analysis via large matrix operations.  
561 *Bioinformatics* 2012;**28**(10):1353–8. Doi: 10.1093/bioinformatics/bts163.
- 562 23. Sun BB., Maranville JC., Peters JE., Stacey D., Staley JR., Blackshaw J., et al. Genomic atlas  
563 of the human plasma proteome. *Nature* 2018;**558**(7708):73–9. Doi: 10.1038/s41586-018-0175-  
564 2.
- 565 24. Clerc F., Novokmet M., Dotz V., Reiding KR., de Haan N., Kammeijer GSM., et al. Plasma  
566 N-Glycan Signatures Are Associated With Features of Inflammatory Bowel Diseases.  
567 *Gastroenterology* 2018;**155**(3):829–43. Doi: 10.1053/j.gastro.2018.05.030.
- 568 25. Parkes M., Noor NM., Dowling F., Leung H., Bond S., Whitehead L., et al. PRedicting  
569 Outcomes For Crohn’s disease using a molecular biomarker (PROFILE): protocol for a  
570 multicentre, randomised, biomarker-stratified trial. *BMJ Open* 2018;**8**(12):e026767. Doi:  
571 10.1136/bmjopen-2018-026767.
- 572 26. Ventham NT., Kennedy NA., Adams AT., Kalla R., Heath S., O’Leary KR., et al. Integrative  
573 epigenome-wide analysis demonstrates that DNA methylation may mediate genetic risk in  
574 inflammatory bowel disease. *Nat Commun* 2016;**7**:13507. Doi: 10.1038/ncomms13507.
- 575 27. West NR., Hegazy AN., Owens BMJ., Bullers SJ., Linggi B., Buonocore S., et al. Oncostatin  
576 M drives intestinal inflammation and predicts response to tumor necrosis factor-neutralizing

- 577 therapy in patients with inflammatory bowel disease. *Nat Med* 2017;**23**(5):579–89. Doi:  
578 10.1038/nm.4307.
- 579 28. Guyer DA., Moore KL., Lynam EB., Schammel CM., Rogelj S., McEver RP., et al. P-selectin  
580 glycoprotein ligand-1 (PSGL-1) is a ligand for L-selectin in neutrophil aggregation. *Blood*  
581 1996;**88**(7):2415–21.
- 582 29. Brown JB., Cheres P., Zhang Z., Ryu H., Managlia E., Barrett TA. P-selectin glycoprotein  
583 ligand-1 is needed for sequential recruitment of T-helper 1 (Th1) and local generation of Th17  
584 T cells in dextran sodium sulfate (DSS) colitis. *Inflamm Bowel Dis* 2012;**18**(2):323–32. Doi:  
585 10.1002/ibd.21779.
- 586 30. D’Haens G., Kelly O., Battat R., Silverberg MS., Laharie D., Louis E., et al. Development and  
587 Validation of a Test to Monitor Endoscopic Activity in Patients With Crohn’s Disease Based  
588 on Serum Levels of Proteins. *Gastroenterology* 2020;**158**(3):515-526.e10. Doi:  
589 10.1053/j.gastro.2019.10.034.
- 590 31. Lachenbruch PA., Mickey MR. Estimation of Error Rates in Discriminant Analysis.  
591 *Technometrics* 1968;**10**(1):1–11. Doi: 10.1080/00401706.1968.10490530.
- 592 32. de Lange KM., Moutsianas L., Lee JC., Lamb CA., Luo Y., Kennedy NA., et al. Genome-wide  
593 association study implicates immune activation of multiple integrin genes in inflammatory  
594 bowel disease. *Nat Genet* 2017;**49**(2):256–61. Doi: 10.1038/ng.3760.
- 595 33. Jiang L., Shen Y., Guo D., Yang D., Liu J., Fei X., et al. EpCAM-dependent extracellular  
596 vesicles from intestinal epithelial cells maintain intestinal tract immune balance. *Nat Commun*  
597 2016;**7**:13045. Doi: 10.1038/ncomms13045.
- 598 34. Srivastava M., Zurakowski D., Cheifetz P., Leichtner A., Bousvaros A. Elevated serum  
599 hepatocyte growth factor in children and young adults with inflammatory bowel disease. *J*  
600 *Pediatr Gastroenterol Nutr* 2001;**33**(5):548–53.
- 601 35. Bank S., Julsgaard M., Abed OK., Burisch J., Broder Brodersen J., Pedersen NK., et al.  
602 Polymorphisms in the NFkB, TNF-alpha, IL-1beta, and IL-18 pathways are associated with

- 603 response to anti-TNF therapy in Danish patients with inflammatory bowel disease. *Aliment*  
604 *Pharmacol Ther* 2019;**49**(7):890–903. Doi: 10.1111/apt.15187.
- 605 36. Ashizuka S., Inatsu H., Kita T., Kitamura K. Adrenomedullin Therapy in Patients with  
606 Refractory Ulcerative Colitis: A Case Series. *Dig Dis Sci* 2016;**61**(3):872–80. Doi:  
607 10.1007/s10620-015-3917-0.
- 608 37. Marshall D., Cameron J., Lightwood D., Lawson ADG. Blockade of colony stimulating factor-  
609 1 (CSF-I) leads to inhibition of DSS-induced colitis. *Inflamm Bowel Dis* 2007;**13**(2):219–24.  
610 Doi: 10.1002/ibd.20055.
- 611 38. Singh UP., Singh NP., Murphy EA., Price RL., Fayad R., Nagarkatti M., et al. Chemokine and  
612 cytokine levels in inflammatory bowel disease patients. *Cytokine* 2016;**77**:44–9. Doi:  
613 10.1016/j.cyto.2015.10.008.
- 614 39. Tsakiris I., Torocsik D., Gyongyosi A., Dozsa A., Szatmari I., Szanto A., et al.  
615 Carboxypeptidase-M is regulated by lipids and CSFs in macrophages and dendritic cells and  
616 expressed selectively in tissue granulomas and foam cells. *Lab Invest* 2012;**92**(3):345–61. Doi:  
617 10.1038/labinvest.2011.168.
- 618 40. FANTOM Consortium and the RIKEN PMI and CLST (DGT)., Forrest ARR., Kawaji H.,  
619 Rehli M., Baillie JK., de Hoon MJL., et al. A promoter-level mammalian expression atlas.  
620 *Nature* 2014;**507**(7493):462–70. Doi: 10.1038/nature13182.
- 621

IBD vs Control

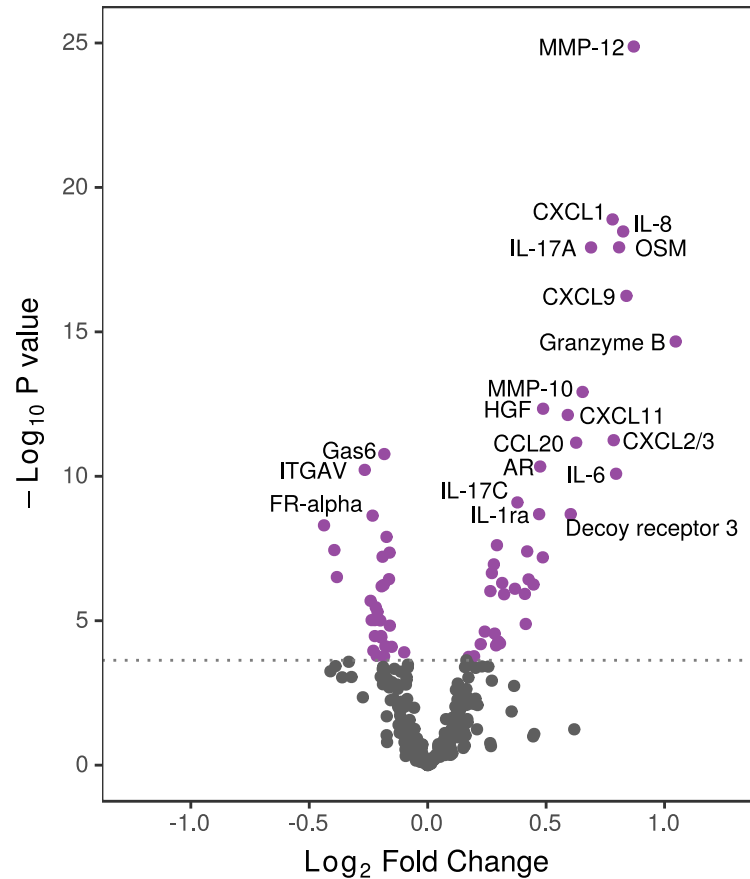

UC vs CD

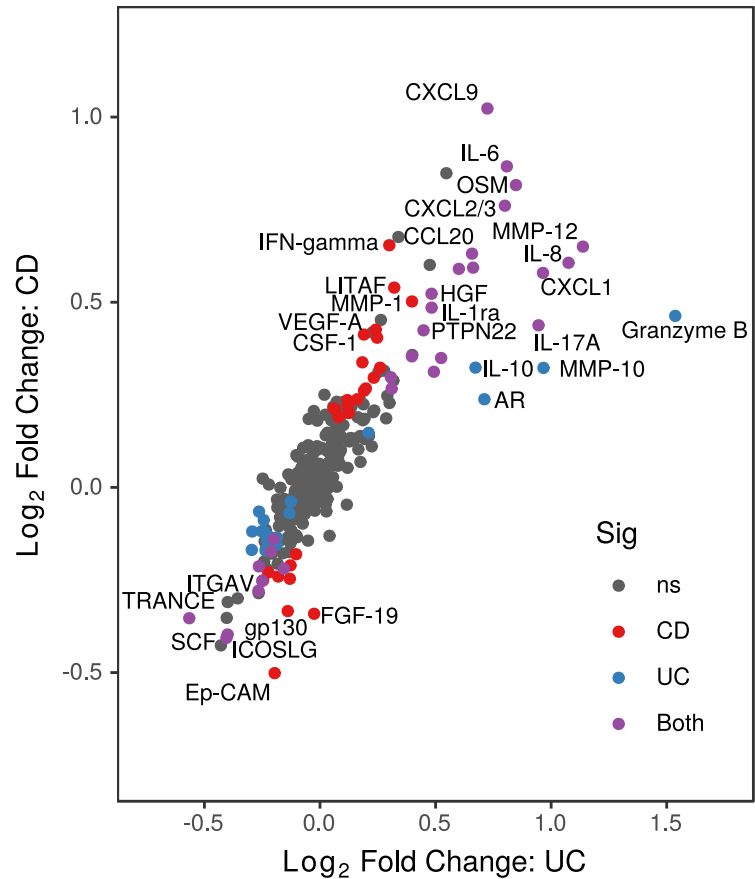

## Inflammatory Bowel Disease

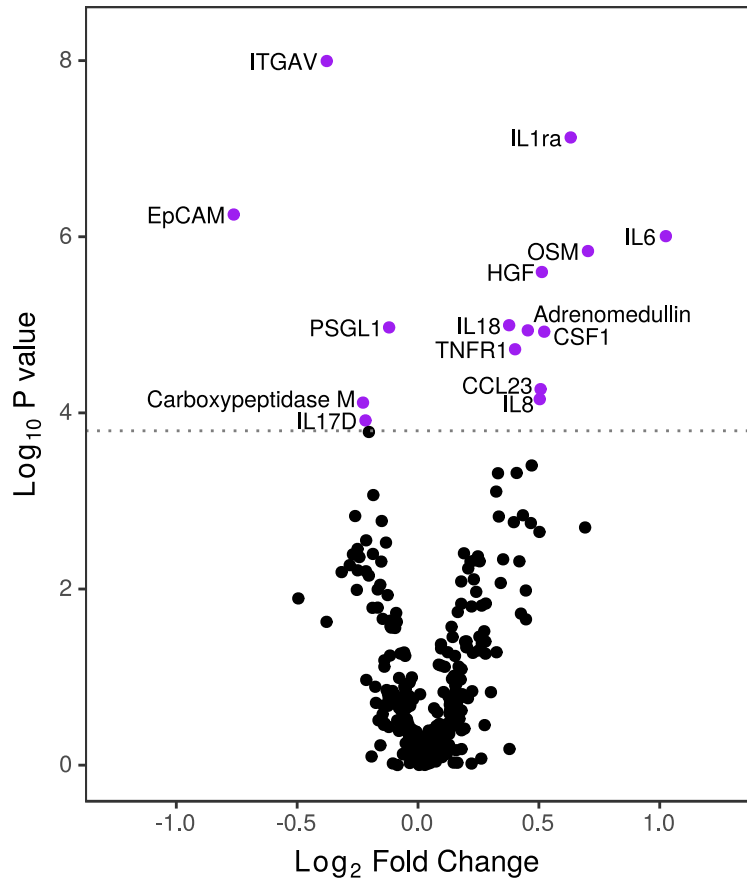

## Ulcerative Colitis

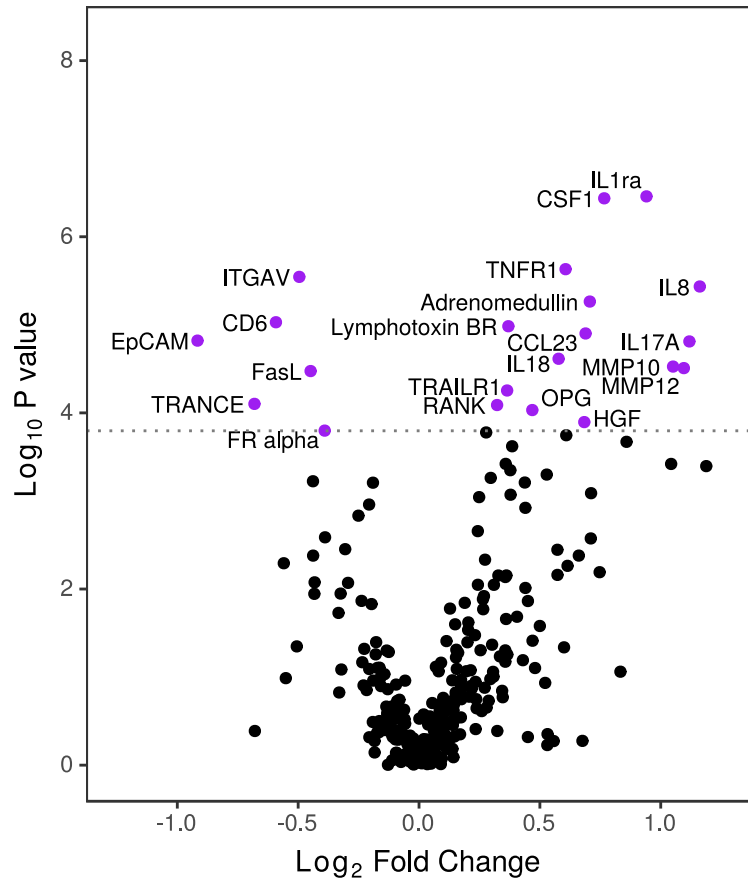

Source: https://www.biorxiv.org/content/biorxiv/early/2020/09/01/2020.08.31.276162.full.pdf
